# Supplementary material
Source: publisher figshare collection journal article supplement (https://acs.figshare.com/ndownloader/files/4319500)
Supplement: Supplementary file 1 [file 4319500]

# Carrier Generation and Collection in CdS/CdSe Sensitized SnO<sub>2</sub> Solar Cells Exhibiting Unprecedented Photocurrent Densities: Supporting Information

*Md. Anower Hossain, James R. Jennings, Koh Zhen Yu and Qing Wang*

Department of Materials Science and Engineering, Faculty of Engineering, NUSNNI-  
NanoCore, National University of Singapore, Singapore 117576

**Optical characteristics of CdS/CdSe sensitized TiO<sub>2</sub> layers.** Figure S1 shows the optical density spectrum of a 5.4  $\mu\text{m}$  thick TiO<sub>2</sub> layer sensitized with CdS and CdSe, each deposited by 5 successive cycles of SILAR.

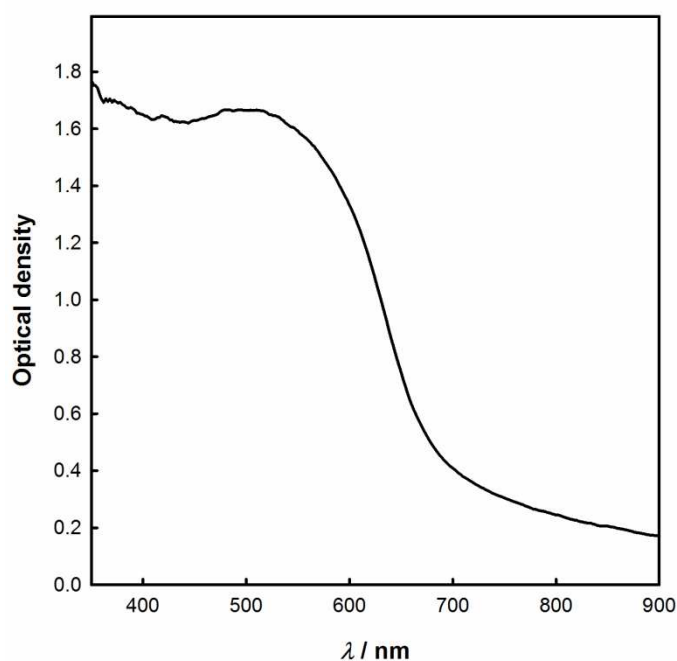

**Figure S1.** Optical density spectrum for a 5.4  $\mu\text{m}$  thick CdS/CdSe sensitized  $\text{TiO}_2$  electrode.

Based upon these data, the light harvesting efficiency of the electrode is predicted to be greater than 99% between 400 and 600 nm for the optimized 9  $\mu\text{m}$  thick  $\text{TiO}_2$  layers used to fabricate SSCs.

**Equivalent circuit used for analysis of impedance spectra.** Figure S2 shows the equivalent circuit used for analysis of impedance spectra. Here  $R_s$  is the series resistance,  $C_{\text{sub}}$  is the substrate capacitance,  $r_t$  is the distributed transport resistance,  $c_\mu$  is the distributed capacitance of the oxide layer,  $r_{\text{ct}}$  is the distributed charge transfer resistance,  $Z_d$  is a Warburg impedance,  $R_{\text{Pt}}$  is the resistance of the Pt-coated cathode and  $C_{\text{Pt}}$  is the capacitance of the cathode. The lower case resistances and capacitances are related to the total resistances and capacitance of the oxide layer (of unit area) by  $R_t = r_t d$ ,  $C_\mu = c_\mu d$  and  $R_{\text{ct}} = r_{\text{ct}}/d$ .

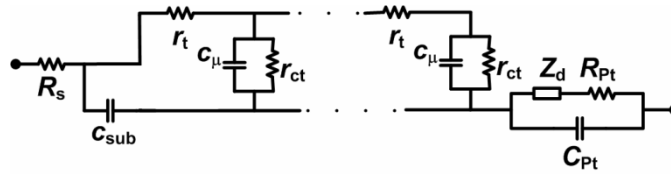

**Figure S2.** Equivalent circuit used for fitting impedance spectra.
